# Supplementary material for: Synthesis, structure and reactivity with phosphines of Hg(ii)ortho-cyano-aminothiophenolate complexes formedviaC–S bond cleavage and dehydrogenation of 2-aminobenzothiazoles
Source: Royal Society of Chemistry journal article supplement (doi:10.1039/d2dt00391k), 2022-01-01
Supplement: d2dt00391k1.pdf [file d2dt00391k1.pdf]

## Synthesis, structure and reactivity with phosphines of Hg(II) *ortho*-cyanoaminothiophenolate complexes formed via C-S bond cleavage and dehydrogenation of 2-aminobenzothiazoles

### Electronic supplementary information

#### Experimental section

##### *General*

$^1\text{H}$  and  $^{31}\text{P}\{^1\text{H}\}$  NMR spectra were recorded on a Varian Unity spectrometer. IR spectra were recorded on either a Shimadzu FT-IR 8400 spectrophotometer in the 400-4000  $\text{cm}^{-1}$  range as KBr discs and in the 200-600  $\text{cm}^{-1}$  as CsI discs or on Bruker Tensor 28 spectrometer with a platinum ATR unit in Martin-Luther Universität Halle-Wittenberg- Germany. Elemental analyses were carried out at Al Al-Bayt University, Jordan using a Euro vector EURO EA300 elemental analyzer. Melting points measured on a Gallenkamp melting point apparatus and are uncorrected. All commercially pure chemicals were used as received from distributor.

##### *Synthesis of $[\text{Hg}\{\text{SC}_6\text{H}_3\text{XN}(\text{C}\equiv\text{N})\}]_n$ (1a-e) (X = H, Me, Cl, Br, NO<sub>2</sub>) (1a-e)*

A solution of 2-aminobenzothiazole (abt) (0.200 g, 1.330 mmol) in ethanol (10 ml) was added to a boiling solution of  $\text{Hg}(\text{OAc})_2$  (0.420 g, 1.330 mmol) in ethanol (10 ml). The mixture was heated at reflux for 2 h affording a pale-yellow precipitate. Upon cooling to room temperature this was collected by filtration, washed with ethanol and dried under vacuum to afford **1a**. Alternatively, sodium acetate (0.028 g, 0.349 mmol) in distilled water (10 ml) was added to a suspension of  $[\text{Hg}(\text{abt})\text{Cl}_2]_n$  (0.050 g, 0.087 mmol) in distilled water (10 ml). The mixture was heated under reflux for 2 h to afford a pale-yellow precipitate, which was filtered off, washed with ethanol and dried under vacuum. **1b-e** were prepared and isolated using similar methods.

**1a**: Yellow, yield: 0.398g (86%). Anal. Calc. for  $\text{C}_7\text{H}_4\text{HgN}_2\text{S}$ : C, 24.11; H, 1.16; N, 8.03. Found: C, 24.17; H, 1.22; N, 7.84%. IR (KBr): 3066m, 2119vs, 1577m, 1471s, 1433m, 746m, 665m  $\text{cm}^{-1}$ .  $^1\text{H}$  NMR (DMSO- $d_6$ ):  $\delta$  6.72 (t, 1H,  $J$  7.6 Hz); 7.07 (d, 1H,  $J$  7.6 Hz); 7.13 (t, 1H,  $J$  7.6 Hz); 7.55 (d, 1H,  $J$  7.6 Hz)  $^{13}\text{C}\{^1\text{H}\}$  NMR (DMSO- $d_6$ ): 111.3, 117.5, 121.4, 125.1, 127.7, 132.7, 144.5 ppm. Melting point: 228°C (decomposes).

**1b:** Yellow, yield: 1.616 g (73%). Anal. Calc. for C<sub>8</sub>H<sub>6</sub>HgN<sub>2</sub>S: C, 26.49; H, 1.67; N, 7.72. Found: C, 26.57; H, 1.72; N, 7.78%. IR: 3024w, 2974w, 2139vs, 1521s, 314m, 273m, cm<sup>-1</sup>. <sup>1</sup>H NMR (DMSO-d<sub>6</sub>): δ 2.29 (s, 3H, CH<sub>3</sub>); 6.89-6.96 (m, 2H); 7.37 (d, 1H, *J* 8.0 Hz). Melting point: 200°C (decomposes).

**1c:** Yellow, yield: 1.710 g (73%). Anal. Calc. for C<sub>7</sub>H<sub>3</sub>ClHgN<sub>2</sub>S: C, 21.94; H, 0.79; N, 7.31. Found: C, 21.66; H, 0.72; N, 7.24%. IR: 3049w, 2136vs, 1519s, 293m, 258m cm<sup>-1</sup>. <sup>1</sup>H NMR (DMSO-d<sub>6</sub>): δ 7.05 (d, 1H, *J* 7.9 Hz); 7.15 (d, 1H, *J* 7.9 Hz); 7.56 (s, 1H). Melting point: 207-210°C (decomposes).

**1d:** Olive, yield: 0.709 g (95%). Anal. Calc. for C<sub>7</sub>H<sub>3</sub>BrHgN<sub>2</sub>S: C, 19.66; H, 0.71; N, 6.55. Found: C, 19.39; H, 1.01; N, 6.38 %. IR (KBr): 3029w, 2119vs, 1624s, 1461m, 746m, 675m cm<sup>-1</sup>. <sup>1</sup>H NMR (DMSO-d<sub>6</sub>): δ 6.34 (d, 1H, *J* 7.5 Hz); 6.9 (dd, 1H, *J* 7.5, 1.9 Hz); 7.15 (d, 1H, *J* 7.5 Hz) ppm. <sup>13</sup>C{<sup>1</sup>H} NMR (DMSO-d<sub>6</sub>): 110.73, 115.6, 117.5, 125.7, 130.3, 131.9, 141.7 ppm. Melting point: 247-249°C (decomposes).

**1e:** Burnt yellow, yield: 2.185 g (91%). Anal. Calc. for C<sub>7</sub>H<sub>3</sub>HgN<sub>3</sub>O<sub>2</sub>S: C, 21.35; H, 0.77; N, 10.67. Found: C, 21.39; H, 0.91; N, 10.38 %. IR (KBr): 3029w, 2119vs, 1624s, 1461m, 746m, 675m cm<sup>-1</sup>. <sup>1</sup>H NMR (DMSO-d<sub>6</sub>): δ 7.15 (d, 1H, *J* 8.0 Hz); 7.41 (d, 1H, *J* 8.0 Hz); 7.98 (s, 1H) ppm. Melting point: 222-224°C (decomposes).

#### *Synthesis of [Hg(μ-abt-H)(κ<sup>2</sup>-OAc)(EtOH)]<sub>2</sub> (3)*

A suspension of Hg(OAc)<sub>2</sub> (1.061 g, 3.320 mmol) in ethanol (10 ml) was added to a solution of 2-aminobenzothiazole (0.50 g, 3.320 mmol) in ethanol (10 ml). The mixture was stirred for 2 h in an ice bath. The pale-yellow solution formed was set aside for a day. Yellow crystals formed which were isolated and dried under vacuum.

**3:** Yield: 1.134g (75%). Anal. Calc. for C<sub>22</sub>H<sub>30</sub>Hg<sub>2</sub>N<sub>4</sub>O<sub>6</sub>S<sub>2</sub>: C, 29.98; H, 3.32; N, 6.14. Found: C, 28.91; H, 3.03; N, 6.00 %. IR (KBr): 3427m, 3371m, 3027w, 2972w, 2121vw, 1595m, 1554m, 1525vs, 1461m, 1413m, 740m, 669m cm<sup>-1</sup>. <sup>1</sup>H NMR (DMSO-d<sub>6</sub>): δ 1.13 (s, 3H, CH<sub>3</sub>); 3.57 (s, 2H, CH<sub>2</sub>); 3.6 (s, 1H, NH); 6.99 (dt, 1H, *J* 7.5, 1.3 Hz); 7.19 (dt, 1H, *J* 7.5 1.3 Hz); 7.32 (dd, 1H, *J* 7.8, 1.2 Hz); 7.52 (dd, 1H, *J* 7.6, 1.2 Hz) ppm. Melting point: 225-227°C (decomposes).

#### *Preparation of [Hg{SC<sub>6</sub>H<sub>3</sub>XN(C≡N)}(PPh<sub>3</sub>)]<sub>2</sub> (4a-e)*

A solution of PPh<sub>3</sub> (0.300 g, 1.143 mmol) in CHCl<sub>3</sub> (10 ml) was added to a suspension of **1a** (0.199 g, 0.571 mmol) in CHCl<sub>3</sub> (10 ml). The mixture was stirred at room temperature for 2 h and the green-yellow solution formed was refluxed for another 2 h. A green-yellow precipitate formed which was filtered off, dried under vacuum, and then recrystallized from CHCl<sub>3</sub>, to give yellow needle-like crystals of **4a**. Complexes **4b-e** were prepared and isolated using similar methods.

**4a:** Yellow, yield: 0.607g (83%). Anal. Calc. for C<sub>25</sub>H<sub>19</sub>HgN<sub>2</sub>PS·CHCl<sub>3</sub>: C, 42.75; H, 2.76; N, 3.84. Found: C, 42.66; H, 2.85; N, 3.89 %. IR (KBr): 3053w, 2140vs, 1465s, 1433s, 744s, 692s cm<sup>-1</sup>. <sup>1</sup>H NMR (CDCl<sub>3</sub>): δ 6.35 (dt, 1H, *J* 7.4, 1.4 Hz); 6.55 (dd, 1H, *J* 7.1, 1.4 Hz); 6.92 (dt, 1H, *J* 7.1, 1.6 Hz); 7.38-7.63 (m, 16H, Ph and H) ppm. <sup>31</sup>P{<sup>1</sup>H} NMR (CDCl<sub>3</sub>): δ 36.5 (brs) ppm. Melting point: 210-213°C.

**4b:** Dark yellow, yield: 0.189 g (78%). Anal. Calc. for C<sub>26</sub>H<sub>21</sub>HgN<sub>2</sub>PS: C, 49.96; H, 3.39, N, 4.48. Found: C, 49.76; H, 3.29; N, 4.44 %. IR: 3064w, 2903w, 2142vs, 1562s, 1433s, 495s cm<sup>-1</sup>. <sup>1</sup>H NMR (CDCl<sub>3</sub>): δ 2.13 (s, 3H, CH<sub>3</sub>); 6.64 (dd, 1H, *J* 8.0, 1.8 Hz); 6.93 (d, 1H, *J* 8.0 Hz); 7.12 (s, 1H); 7.48-7.62 (m, 15H, Ph) ppm. <sup>31</sup>P{<sup>1</sup>H} NMR (CDCl<sub>3</sub>): δ 25.4 (brs) ppm. Melting point: 227-230°C.

**4c:** Yellow, yield: 0.142 g (60%). Anal. Calc. for C<sub>25</sub>H<sub>18</sub>ClHgN<sub>2</sub>PS·2CHCl<sub>3</sub>: C, 46.52; H, 2.81, N, 4.34. Found: C, 46.72; H, 3.01; N, 4.59 %. IR (KBr): 3058w, 2142vs, 1549s, 1433s, 493s cm<sup>-1</sup>. <sup>1</sup>H NMR (CDCl<sub>3</sub>): δ 6.56 (dd, 1H, *J* 8.0, 1.4 Hz); 6.82 (dd, 1H, *J* = 8.0, 1.4 Hz); 7.21 (s, 1H); 7.36-7.47 (m, 15H, Ph) ppm. <sup>31</sup>P{<sup>1</sup>H} NMR (CDCl<sub>3</sub>): δ 29.0 (brs) ppm. Melting point: 212-213°C.

IR (KBr): 3072w, 2163vs, 2142vs, 1460vs, 1434vs, 1317s, 1099s, 746s, 688s cm<sup>-1</sup>. <sup>1</sup>H NMR (CDCl<sub>3</sub>): δ 6.75 (s, 1H); 6.94 (dd, 1H, *J* 8.5, 2.1 Hz); 7.13 (d, 1H, *J* 8.8 Hz); 7.3-7.70 (m, 15H, Ph) ppm. <sup>31</sup>P{<sup>1</sup>H} NMR (CDCl<sub>3</sub>): δ 25.5 (brs) ppm. Melting point: 177-180°C.

**4e:** Brown-yellow, yield: 0.182 g (68%). Anal. Calc. for C<sub>25</sub>H<sub>18</sub>HgN<sub>3</sub>PO<sub>2</sub>S·CHCl<sub>3</sub>: C, 40.27; H, 2.47; N, 5.42. Found: C, 40.17; H, 2.49; N, 5.51%. IR (KBr): 3055w, 2136vs, 1460vs, 1434vs, 1301vs (NO<sub>2</sub>), 501s cm<sup>-1</sup>. <sup>1</sup>H NMR (CDCl<sub>3</sub>): δ 7.19-7.74 (m, 18H, Ph and H) ppm. <sup>31</sup>P{<sup>1</sup>H} NMR (CDCl<sub>3</sub>): δ 35.6 (brs) ppm. Melting point: 181-184°C.

#### *Preparation of [Hg{SC<sub>6</sub>H<sub>4</sub>N(C≡N)}(PPh<sub>3</sub>)<sub>2</sub>] (5)*

A solution of PPh<sub>3</sub> (0.100 g, 0.380 mmol) in CHCl<sub>3</sub> (10 ml) was added to a suspension of **1a** (0.063 g, 0.190 mmol) in CHCl<sub>3</sub> (10 ml). The mixture was stirred at room temperature for 20

mins and reflux on water bath for 2 h, the mixture was left to evaporate the solvent and the yellow precipitate formed was filtered off and dried under vacuum. (Yield: 0.058 g, 35%).

**5:** Yellow, yield: 0.058 g (35%). Anal. Calc. for  $C_{43}H_{34}HgP_2N_2S$ : C, 59.14; H, 3.92; N, 3.21. Found: C, 58.89; H, 4.21; N, 3.28%. IR (KBr): 3053w, 2140vs, 1465s, 1434s, 1313m, 1101m, 748vs, 688m  $cm^{-1}$ .  $^1H$  NMR ( $CDCl_3$ ):  $\delta$  6.33 (t, 1H,  $J$  6.8 Hz); 6.51 (d, 1H,  $J$  7.5 Hz); 6.91 (dt, 1H,  $J$  7.5, 1.6 Hz); 7.37-7.64 (m, 31H, Ph and H) ppm.  $^{31}P\{^1H\}$  NMR ( $CDCl_3$ ):  $\delta$  29.2 ppm. Melting point: 212-215°C.

*Synthesis of  $[Hg\{SC_6H_3XN(C\equiv N)\}(\kappa^1-dppm)]_2$  (**6a-d**)*

A solution of dppm (0.024 g, 0.062 mmol) in ethanol (10 ml) was added to a suspension of **1a** (0.021 g, 0.062 mmol) in ethanol (10 ml) and stirred at room temperature for 2 h. The green-yellow precipitate formed was filtered off, dried under vacuum, and recrystallized from  $CHCl_3$  to give yellow crystals. Complexes **6b-d** were prepared using a similar method.

**6a:** Yellow, yield: 0.032 g (71%). Anal. Calc. for  $C_{32}H_{21}HgN_2P_2S$ : C, 52.79; H, 2.91; N, 3.85. Found: C, 52.71; H, 3.07; N, 3.87%. IR (KBr): 3051w, 2933w, 2155vs, 1463s, 1433s, 1301s, 1101m, 742vs, 690s  $cm^{-1}$ .  $^1H$  NMR ( $CDCl_3$ ):  $\delta$  4.0 (bs, 2H,  $CH_2$ ); 6.55 (t, 1H,  $J$  7.5 Hz); 6.84 (t, 1H,  $J$  7.5 Hz); 7.06 (d, 1H,  $J$  7.5 Hz); 7.28 (d, 1H,  $J$  7.5 Hz); 7.31-7.64 (m, 20H, Ph) ppm.  $^{31}P\{^1H\}$  NMR ( $CDCl_3$ ):  $\delta$  -2.6 (d,  $J$  29 Hz), 9.9 (d,  $J$  29 Hz) ppm. Melting point: 169-172°C.

**6b:** Yellow, yield: 0.456 g (78%). Anal. Calc. for  $C_{33}H_{28}HgN_2P_2S$ : C, 53.05; H, 3.78; N, 3.75. Found: C, 52.86; H, 3.53; N, 3.51%. IR: 3029w, 2923w, 2140vs, 1539s, 1434s, 503s, 351m, 254w  $cm^{-1}$ .  $^1H$  NMR ( $CDCl_3$ ):  $\delta$  2.36 (s, 3H,  $CH_3$ ); 4.23 (brs, 2H,  $CH_2$ ); 7.11-8.00 (m, 23H, Ph and H).  $^{31}P\{^1H\}$  NMR ( $CDCl_3$ ):  $\delta$  -2.6 (d,  $J$  29 Hz), 10.1 (d,  $J$  29 Hz) ppm. Melting point: 102-103°C.

**6c:** Yellow, yield: 0.384 g (64%). Anal. Calc. for  $C_{32}H_{25}ClHgN_2P_2S$ : C, 50.07; H, 3.28; N, 3.65. Found: C, 49.98; H, 3.13; N, 3.52%. IR: 3083w, 2893w, 2138vs, 1539s, 1434s, 503s, 349m, 312m, 258w  $cm^{-1}$ .  $^1H$  NMR ( $CDCl_3$ ):  $\delta$  4.45 (brs, 2H,  $CH_2$ ); 6.87-7.93 (m, 23H, Ph).  $^{31}P\{^1H\}$  NMR ( $CDCl_3$ ):  $\delta$  -1.6 (d,  $J$  31 Hz), 15.8 (d,  $J$  31 Hz) ppm. Melting point: 114-117°C.

**6d:** Red-yellow, yield: 0.192 g (84%). Anal. Calc. for  $C_{32}H_{25}HgN_3O_2P_2S$ : C, 49.39; H, 3.24; N, 5.40. Found: C, 49.58; H, 3.51; N, 5.71 %. IR: 3055w, 2950w, 2136vs, 1460s, 1434s, 1301vs ( $NO_2$ ), 503s, 351m  $cm^{-1}$ .  $^1H$  NMR ( $CDCl_3$ ):  $\delta$  3.73 (brs, 2H,  $CH_2$ ); 7.15 (d, 1H,  $J$  8.0 Hz); 7.28-7.43 (m, 20H, Ph); 7.73 (d, 1H,  $J$  8.0 Hz); 7.83 (s, 1H).  $^{31}P\{^1H\}$  NMR ( $CDCl_3$ ):  $\delta$  -6.0 (d,  $J$  23 Hz), 13.1 (d,  $J$  23 Hz) ppm. Melting point: 298-301°C.

*Synthesis of [Hg<sub>2</sub>(μ-Cl)(μ-dppm)<sub>2</sub>Cl<sub>2</sub>]Cl*

Boiling **6a** in CHCl<sub>3</sub> for 8 h produced green-yellow crystals. X-ray diffraction showed that the product was [Hg<sub>2</sub>(μ-Cl)(μ-dppm)<sub>2</sub>Cl<sub>2</sub>]Cl. This complex has previously been prepared *via* a quite different method [1].

*Synthesis of [Hg{SC<sub>6</sub>H<sub>3</sub>XN(C≡N)}(κ<sup>l</sup>,κ<sup>l</sup>-dppe)]<sub>n</sub> (7a-d)*

A solution of dppe (0.300 g, 1.143 mmol) in CHCl<sub>3</sub> (10 ml) was added to a suspension of **1a** (0.199 g, 0.571 mmol) in CHCl<sub>3</sub> (10 ml). The mixture was stirred at room temperature for 2 h. The green-yellow solution formed was further refluxed for 2 h. A green-yellow precipitate formed which was filtered off, dried under vacuum and recrystallized from CHCl<sub>3</sub> to give yellow needle-like crystals.

**7a**: Yield: 0.342 g (80%). Anal. Calc. for C<sub>33</sub>H<sub>28</sub>HgN<sub>2</sub>P<sub>2</sub>S: C, 53.05; H, 3.78, N, 3.75. Found: C, 53.11; H, 3.83; N, 3.59%. IR (KBr): 3051w, 2904, 2142vs, 1461s, 1434vs, 1294m, 1103m, 744s, 692m cm<sup>-1</sup>. <sup>1</sup>H NMR (CDCl<sub>3</sub>): δ 2.67 (bs, 4H, 2CH<sub>2</sub>); 7.12 (dt, 1H, *J* 7.8, 1.2 Hz); 7.58 (dd, 1H, *J* 7.8, 0.9 Hz); 7.28-7.56 (m, 22H, Ph and H) ppm. <sup>31</sup>P{<sup>1</sup>H} NMR (CDCl<sub>3</sub>): δ 23.7 (s) ppm. Melting point: 210-213°C.

For **7b-d** similar methods were followed but the products were recrystallised from dmf to give analytically dmf adducts.

**7b**: Yellow, yield: 0.115 (79%). Anal. Calc. for C<sub>48</sub>H<sub>48</sub>Hg<sub>2</sub>N<sub>6</sub>O<sub>2</sub>P<sub>2</sub>S<sub>2</sub>: C, 45.46; H, 3.81; N, 6.63. Found: C, 45.68; H, 3.93; N, 6.72%. IR: 3055w, 2914w, 2135vs, 1527s, 1436s, 509s, 337m, 300m, 243w cm<sup>-1</sup>. <sup>1</sup>H NMR (CDCl<sub>3</sub>): δ 2.11 (s, 3H, CH<sub>3</sub>); 2.63 (s, 4H, CH<sub>2</sub>); 6.86 (dd, 1H, *J* 7.9, 1.6 Hz); 7.14 (d, 1H, *J* 8.0 Hz); 7.41 (s, 1H); 7.34-7.43 (m, 20H, Ph). <sup>31</sup>P{<sup>1</sup>H} NMR (CDCl<sub>3</sub>): δ 53.5 (d, *J* 29 Hz), 60.0 (d, *J* 29 Hz) ppm. Melting point: 182-185°C.

**7c**: Yellow, yield: 0.105 (70%). Anal. Calc. for C<sub>46</sub>H<sub>42</sub>Cl<sub>2</sub>Hg<sub>2</sub>N<sub>6</sub>O<sub>2</sub>P<sub>2</sub>S<sub>2</sub>: C, 42.21; H, 3.23; N, 6.42. Found: C, 42.36; H, 3.43; N, 6.76%. IR: 3055w, 2958w, 2133vs, 1564s, 1433s, 505s, 370m, 333m, 266w cm<sup>-1</sup>. <sup>1</sup>H NMR (CDCl<sub>3</sub>): δ 2.86 (s, 4H, CH<sub>2</sub>); 6.81 (dd, 1H, *J* 7.9, 1.6 Hz); 7.14 (d, 1H, *J* 7.9 Hz); 7.36-7.50 (m, 21H, Ph and H). <sup>31</sup>P{<sup>1</sup>H} NMR (DMSO-d<sub>6</sub>): δ 17.7 (d, *J* 35 Hz), 39.0 (d, *J* 35 Hz) ppm. Melting point: 181-182°C.

**7d**: Yellow, yield: 0.11g (67%). Anal. Calc. for C<sub>33</sub>H<sub>27</sub>HgN<sub>3</sub>O<sub>2</sub>P<sub>2</sub>S: C, 50.03; H, 3.44; N, 5.30. Found C, 50.28; H, 3.51; N, 5.42: %. IR (KBr): 3058w, 2968w, 2142vs (CN), 1460s, 1434s, 1292vs (NO<sub>2</sub>), 508s cm<sup>-1</sup>. <sup>1</sup>H NMR (CDCl<sub>3</sub>): δ 2.23 (s, 4H, CH<sub>2</sub>); 7.21-7.98 (m, 23H, Ph and

H).  $^{31}\text{P}\{^1\text{H}\}$  NMR ( $\text{CDCl}_3$ ):  $\delta$  36.5 (d,  $J$  34 Hz), 45.5 (d,  $J$  34 Hz) ppm. Melting point:  $>300^\circ\text{C}$  (decomposes).

*Synthesis of  $[\text{Hg}\{\text{SC}_6\text{H}_3\text{XN}(\text{C}\equiv\text{N})\}(\mu\text{-dppp})]_2$  (**8a-d**)*

A solution of dppp (0.106 g, 0.242 mmol) in ethanol (10 ml) was added to a suspension of **1a** (0.084 g, 0.242 mmol) in ethanol (10 ml). The mixture was stirred at room temperature for 2 h and the resulting green-yellow solution left to slowly evaporation at room temperature to give pale yellow solid which was filtered off and dried under vacuum.

**8a**: Yield: 0.150 g (80%). Anal. Calc. for  $\text{C}_{34}\text{H}_{30}\text{HgN}_2\text{P}_2\text{S}$ : C, 53.65; H, 3.97, N, 3.68. Found: C, 53.85; H, 3.93; N, 3.57%. IR (KBr): 3051w, 2921w, 2121vs, 1465s, 1433s, 1303s, 1101m, 744s, 694m  $\text{cm}^{-1}$ .  $^1\text{H}$  NMR ( $\text{CDCl}_3$ ):  $\delta$  1.26 (t, 4H,  $J$  7.0 Hz,  $2\text{CH}_2$ ); 3.73 (m, 2H,  $\text{CH}_2$ ); 6.53 (t, 1H,  $J$  7.4 Hz); 6.78 (t, 1H,  $J$  7.4 Hz); 7.12 (d, 1H,  $J$  7.4 Hz); 7.24 (d, 1H,  $J$  7.4 Hz); 7.33-7.47 (m, 20H, Ph) ppm.  $^{31}\text{P}\{^1\text{H}\}$  NMR:  $\delta$  15.0 (bs) ppm. Melting point: 162-164 $^\circ\text{C}$ .

**8b**: Yellow, yield: 0.214 (78%). Anal. Calc. for  $\text{C}_{43}\text{H}_{38}\text{Hg}_2\text{N}_4\text{P}_2\text{S}_2$ : C, 45.38; H, 3.37; N, 4.92. Found: C, 45.46; H, 3.66; N, 5.08%. IR: 3053w, 2908w, 2121vs, 1562s, 1434s, 513s, 349m, 310m, 268w  $\text{cm}^{-1}$ .  $^1\text{H}$  NMR ( $\text{CDCl}_3$ ):  $\delta$  1.80 (bs, 2H,  $\text{CH}_2$ ); 2.89 (s, 3H,  $\text{CH}_3$ ); 3.19 (bs, 4H,  $2\text{CH}_2$ ); 6.92 (d, 1H,  $J$  7.8 Hz); 7.13 (d, 1H,  $J$  7.8 Hz); 7.22 (s, 1H); 7.51-7.78 (m, 20H, Ph).  $^{31}\text{P}\{^1\text{H}\}$  NMR ( $\text{CDCl}_3$ ):  $\delta$  27.5 (d,  $J$  36 Hz), 36.5 (d,  $J$  36 Hz) ppm. Melting point: 108-111 $^\circ\text{C}$ .

**8c**: Light yellow, yield: 0.202 (71%). Anal. Calc. for  $\text{C}_{41}\text{H}_{32}\text{Cl}_2\text{Hg}_2\text{N}_4\text{P}_2\text{S}_2$ : C, 41.77; H, 2.74; N, 4.75. Found: C, 41.46; H, 2.66; N, 4.48%. IR: 3053w, 2898w, 2115vs, 1545m, 1433s, 511s,  $\text{cm}^{-1}$ .  $^1\text{H}$  NMR ( $\text{CDCl}_3$ ):  $\delta$  1.90 (bs, 2H,  $\text{CH}_2$ ); 3.09 (bs, 4H,  $2\text{CH}_2$ ); 6.72 (dd, 1H,  $J$  8.0, 1.5 Hz); 6.82 (d, 1H,  $J$  8.0 Hz); 7.22 (s, 1H); 7.51-7.78 (m, 20H, Ph).  $^{31}\text{P}\{^1\text{H}\}$  NMR ( $\text{CDCl}_3$ ):  $\delta$  21.5 (d,  $J$  41 Hz), 36.5 (d,  $J$  41 Hz) ppm. Melting point: 219-220 $^\circ\text{C}$ .

**8d**: Brown, yield: 0.218 (75%). Anal. Calc. for  $\text{C}_{41}\text{H}_{32}\text{Hg}_2\text{N}_6\text{O}_4\text{P}_2\text{S}_2$ : C, 41.04; H, 2.69; N, 7.00. Found: C, 41.23; H, 2.81; N, 7.13%. IR: 3082w, 2911w, 2120vs, 1544m, 1436s, 505s,  $\text{cm}^{-1}$ .  $^1\text{H}$  NMR ( $\text{CDCl}_3$ ):  $\delta$  1.81 (bs, 2H,  $\text{CH}_2$ ); 2.76 (bs, 4H,  $2\text{CH}_2$ ); 6.72-7.78 (m, 23H, Ph and H).  $^{31}\text{P}\{^1\text{H}\}$  NMR ( $\text{CDCl}_3$ ):  $\delta$  42.0 (bs) ppm. Melting point: 197-198 $^\circ\text{C}$ .

*Preparation of  $[\text{Hg}\{\text{SC}_6\text{H}_3\text{XN}(\text{C}\equiv\text{N})\}(\mu\text{-}\kappa^l, \kappa^l\text{-dppb})]$  (**9a-d**)*

Prepared in a similar manner to that described above for dppp

**9a**: Cream, yield: 0.44g (65%). Anal. Calc. for  $\text{C}_{35}\text{H}_{32}\text{HgN}_2\text{P}_2\text{S}$ : C, 54.23; H, 4.16; N, 3.61. Found: C, 54.39; H, 4.14; N, 3.55%. IR (KBr): 3053w, 2918w, 2144vs, 1465s, 1433m, 1301m,

1105m, 746m, 688w  $\text{cm}^{-1}$ .  $^1\text{H}$  NMR ( $\text{CDCl}_3$ ):  $\delta$  1.80 (bs, 4H, 2 $\text{CH}_2$ ); 3.12 (bs, 4H, 2 $\text{CH}_2$ ); 6.58 (t, 1H,  $J$  7.8 Hz); 6.86 (t, 1H,  $J$  7.5 Hz); 7.07 (d, 1H,  $J$  7.5 Hz); 7.31 (d, 1H,  $J$  7.8 Hz); 7.59-7.88 (m, 20H, Ph) ppm.  $^{31}\text{P}\{^1\text{H}\}$  NMR ( $\text{CDCl}_3$ ):  $\delta$  43.3 (bs) ppm. Melting point: 244-246°C.

**9b**: Yellow, yield: 0.436 g (81%). Anal. Calc. for  $\text{C}_{36}\text{H}_{34}\text{HgN}_2\text{P}_2\text{S}$ : C, 54.78; H, 4.34; N, 3.55 Found: C, 54.99; H, 4.14; N, 3.71%. IR: 3053w, 2929w, 2144vs, 1539s, 1434s, 509s,  $\text{cm}^{-1}$ .  $^1\text{H}$  NMR ( $\text{CDCl}_3$ ):  $\delta$  1.84 (bs, 4H, 2 $\text{CH}_2$ ); 2.56 (bs, 4H, 2 $\text{CH}_2$ ); 2.56 (s, 3H,  $\text{CH}_3$ ); 7.00 (d, 1H,  $J$  8.0 Hz); 7.13 (d, 1H,  $J$  8.0 Hz); 7.39 (s, 1H); 7.40-7.78 (m, 20H, Ph) ppm.  $^{31}\text{P}\{^1\text{H}\}$  NMR ( $\text{CDCl}_3$ ):  $\delta$  0.2 (d,  $J$  30 Hz), 15.8 (d,  $J$  30 Hz) ppm. Melting point: 215-218°C.

**9c**: Light yellow, yield: 0.436 g (79%). Anal. Calc. for  $\text{C}_{35}\text{H}_{31}\text{ClHgN}_2\text{P}_2\text{S}$ : C, 51.92; H, 3.86; N, 3.46. Found: C, 52.03; H, 3.81; N, 4.62%. IR: 3051w, 2929w, 2135vs, 1562s, 1433s, 511s,  $\text{cm}^{-1}$ .  $^1\text{H}$  NMR ( $\text{CDCl}_3$ ):  $\delta$  1.81 (bs, 4H, 2 $\text{CH}_2$ ); 2.38 (bs, 4H, 2 $\text{CH}_2$ ); 6.84 (dd, 1H,  $J$  8.0 1.4 Hz); 6.98 (d, 1H,  $J$  8.0 Hz); 7.27 (s, 1H); 7.45-7.81 (m, 20H, Ph) ppm.  $^{31}\text{P}\{^1\text{H}\}$  NMR ( $\text{CDCl}_3$ ):  $\delta$  23.4 (d,  $J$  30 Hz), 29.6 (d,  $J$  30 Hz) ppm. Melting point: 226-228°C.

**9d**: Brown-yellow, yield: 0.120 g (72%). Anal. Calc. for  $\text{C}_{35}\text{H}_{31}\text{HgN}_3\text{O}_2\text{P}_2\text{S}$ : C, 51.25; H, 3.81; N, 5.12. Found: C, 51.11; H, 3.77; N, 5.22%. IR: 3050w, 2899w, 2141vs, 1476s, 1434s, 506s,  $\text{cm}^{-1}$ .  $^1\text{H}$  NMR ( $\text{CDCl}_3$ ):  $\delta$  1.92 (bs, 4H, 2 $\text{CH}_2$ ); 2.62 (bs, 4H, 2 $\text{CH}_2$ ); 6.87-7.81 (m, 23H, Ph and H) ppm.  $^{31}\text{P}\{^1\text{H}\}$  NMR ( $\text{CDCl}_3$ ):  $\delta$  3.7 (d,  $J$  30 Hz), 24.3 (d,  $J$  30 Hz) ppm. Melting point: 256-260°C.

#### *Preparation of $[\text{Hg}\{\text{SC}_6\text{H}_3\text{XN}(\text{C}\equiv\text{N})\}(\text{dppf})]$ (**10a**, **10e**)*

A solution of dppf (0.318 g, 0.573 mmol) in ethanol (10 ml) was added to a suspension of **1a** (0.200 g, 0.573 mmol) in ethanol (10 ml). The mixture was stirred at room temperature for 2 h and the resulting brownish-yellow solution left to slowly evaporation at room temperature to give brown- yellow solid which was filtered off and dried under vacuum. Complex **10e** was prepared and isolated using a similar method.

**10a**: Brown-yellow, yield: 0.368 g (71%). Anal. Calc. for  $\text{C}_{41}\text{H}_{32}\text{FeHgN}_2\text{P}_2\text{S}$ : C, 54.53; H, 3.57; N, 3.10. Found: C, 54.64; H, 3.75; N, 3.04%. IR (KBr): 3055w, 2144s, 1463s, 1433s, 1299m, 1099m, 746vs, 694s  $\text{cm}^{-1}$ .  $^1\text{H}$  NMR ( $\text{CDCl}_3$ ):  $\delta$  4.35 (brs, 4H, Cp); 4.41 (brs, 4H, Cp); 6.56 (t, 1H,  $J$  7.3 Hz); 6.78 (t, 1H,  $J$  7.3 Hz); 7.06 (d, 1H,  $J$  7.3 Hz); 7.25 (d, 1H,  $J$  7.3 Hz); 7.37-7.57 (m, 20H, Ph) ppm.  $^{31}\text{P}\{^1\text{H}\}$  NMR ( $\text{CDCl}_3$ ):  $\delta$  26.1 (bs) ppm. Melting point: 160-176°C

**10e:** Brown-yellow, yield: 0.11 g (74%). Anal. Calc. for  $C_{41}H_{31}FeHgN_3O_2P_2S$ : C, 51.94; H, 3.30; N, 4.43. Found: C, 51.64; H, 3.25; N, 4.34%. IR (KBr): 3058w, 2142s, 1462s, 1436s, 1301vs ( $NO_2$ ), 486m  $cm^{-1}$ .  $^1H$  NMR ( $CDCl_3$ ):  $\delta$  4.44 (brs, 4H, Cp); 4.51 (brs, 4H, Cp); 6.88-7.82 (m, 23H, Ph and H) ppm.  $^{31}P\{^1H\}$  NMR ( $CDCl_3$ ):  $\delta$  43.4 (s) ppm. Melting point:  $>300$  °C decomposes.

### *Crystallography*

Crystals of **3**, **4a** and **4d** were mounted on glass fibers and all geometric and intensity data were taken from these samples using a Bruker SMART APEX CCD diffractometer with graphite-monochromator Mo- $K\alpha$  radiation ( $\nu = 0.71073$  Å) at  $150 \pm 2$  K. Data collection, indexing and initial cell refinements were done using SMART software. Data reduction was carried out with SAINT PLUS and absorption corrections applied using the programme, SADABS [2] [For **3**:  $R_{int}$  (before abs. correction) = 0.1329,  $R_{int}$  (after SADABS) = 0.0554, for **4a**  $R_{int}$  (before abs. correction) = 0.1211,  $R_{int}$  (after SADABS) = 0.0430, for **4d**  $R_{int}$  (before abs. correction) = 0.1849,  $R_{int}$  (after SADABS) = 0.0579]. Structures were solved by direct methods and developed using alternating cycles of least-squares refinement and difference-Fourier synthesis. All non-hydrogen atoms were refined anisotropically. Hydrogens were placed in calculated positions (riding model). Structure solution used SHELXTL PLUS V6.10 program package [3]. For **3**, a short intermolecular interaction (1.93 Å) is seen between H(3A) and H(9A) which results from use of the riding model to place these hydrogen atoms thus leading to an artificial short contact.

Crystals of **4b**, **7b**, **8b**, **8c** and **9b** were mounted on a glass fiber and all geometric and intensity data were taken from this sample using a STOE-IPDS diffractometer with Mo- $K\alpha$  radiation ( $\lambda = 0.7103$  Å, graphite monochromator) at  $213 \pm 2$  K or  $200 \pm 2$  K. Absorption corrections were made using the IPDS software package [4]. All structures were solved by direct methods and refined using full-matrix least-square routines against  $F^2$  with SHELXL-97 [5]. Non-hydrogen atoms were refined with anisotropic displacement parameters. Hydrogen atoms were included in the models by calculating the positions (riding model) and refined with calculated isotropic displacement parameters. Illustrations were generated using DIAMOND 3.0 [6].

Crystallographic data and structure refinement details are given below. For a number of the structures there are relatively large min/max peaks remaining following refinement, which are



not unremarkable for structures with heavy atoms. The structures of **4a**, **4d** and **9b** have previously been published as part of a communication [7]. Crystallographic data have been deposited with the Cambridge Crystallographic Data Centre. Copies of this information may be obtained free of charge from the Director, CCDC, 12 Union Road, Cambridge, CB2 1EZ, UK (fax: +44-1223-336033; e-mail: [deposit@ccdc.cam.ac.uk](mailto:deposit@ccdc.cam.ac.uk) or [www: http://www.ccdc.ac.uk](http://www.ccdc.ac.uk)).

The structure of **6a**.0.5 CHCl<sub>3</sub> was of poor quality but clearly shows the connectivity of the molecule which is in full accord with the NMR spectra. We thus include below a ball and stick model of this structure with some preliminary bond lengths and angles.

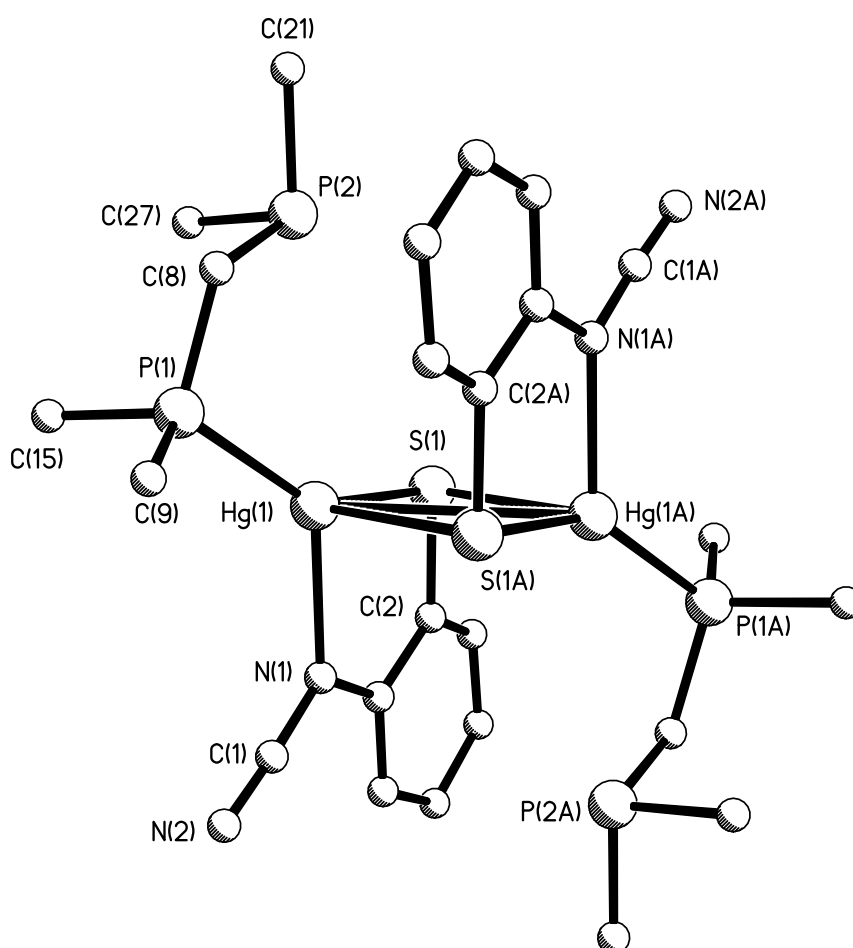

**Figure ESI1.** Molecular structure of [Hg{SC<sub>6</sub>H<sub>4</sub>N(C≡N)}(κ<sup>1</sup>-dppm)]<sub>2</sub> (**6a**). Selected bond lengths (Å) and bond angles (°): Hg1-N1 2.238(10), Hg1-S1 2.414(3), Hg1-S1A 2.895(3), Hg1-P1 2.360(4), Hg1...Hg1A 3.4229(15), N1-C1 1.303(16), N2-C1 1.217(15); Hg1-S1-Hg1A

79.74(9), S1-Hg1-S1A 100.26(9), S1-Hg1-N1 81.6(3), P1-Hg-S1 145.21(13), P1-Hg1-N1 128.7(3), N1-C1-N2 177.1(17).

## References

1. P. D. Harvey, K. T. Aye, K. Hierso, E. Isabel, I. Lognot, Y. Mugnier and F. D. Rochon, *Inorg. Chem.*, 1994, **33**, 5981-5982.
2. SMART and SAINT1 Software for CCD Diffractometers, Version 6.1, Bruker AXS, Madison, WI, 2000.
3. G. M. Sheldrick, SHELXTL PLUS, version 6.1, Bruker AXS, Madison, WI, 2000.
4. IPDS-Software Package, Stoe and Cie, 1999.
5. G. M. Sheldrick, SHELXS-97, Program for Refinement of Crystal Structures, Göttingen, 1997.
6. K. Brandenburg. Diamond 3.2k, Crystal Impact, GbR, Bonn, 2014.
7. S.A. Al-Jibori, A.A. Irzoqi, E.G.H. Al-Saraj, A.S.M. Al-Janabi, S. Basak-Modi, S. Ghosh, K. Merzweiler, C. Wagner, H. Schmidt and G. Hogarth, *Dalton Trans.*, 2015, **44**, 14217-14219.

|                                   | <b>3</b>                                                                                           | <b>4a [ref 7]</b>                                                                                                   | <b>4b [ref 7]</b>                                                                                                   |
|-----------------------------------|----------------------------------------------------------------------------------------------------|---------------------------------------------------------------------------------------------------------------------|---------------------------------------------------------------------------------------------------------------------|
| Identification code               | CCDC 2112641                                                                                       | CCDC 934324                                                                                                         | CCDC 2097813                                                                                                        |
| Empirical formula                 | C <sub>11</sub> H <sub>14</sub> Hg N <sub>2</sub> O <sub>3</sub> S <sub>1</sub>                    | C <sub>25</sub> H <sub>19</sub> Hg N <sub>2</sub> P S                                                               | C <sub>26</sub> H <sub>21</sub> Hg N <sub>2</sub> P S                                                               |
| Formula weight                    | 454.89                                                                                             | 611.04                                                                                                              | 625.07                                                                                                              |
| Temperature                       | 150(2) K                                                                                           | 150(2) K                                                                                                            | 213(2) K                                                                                                            |
| Wavelength                        | 0.71073 Å                                                                                          | 0.71073 Å                                                                                                           | 0.71073 Å                                                                                                           |
| Crystal system, space group       | monoclinic, P2 <sub>1</sub> /c                                                                     | triclinic, P-1                                                                                                      | triclinic, P-1                                                                                                      |
| Unit cell dimensions              | a = 11.161(4) Å, α = 90 deg.<br>b = 8.363(3) Å, β = 92.388(6) deg.<br>c = 13.481(5) Å, γ = 90 deg. | a = 8.955(3) Å, α = 103.936(5) deg.<br>b = 10.643(4) Å, β = 102.011(5) deg.<br>c = 12.059(4) Å, γ = 101.091(5) deg. | a = 9.5001(5) Å, α = 111.211(4) deg<br>b = 11.3813(6) Å, β = 92.649(4) deg<br>c = 12.3018(6) Å, γ = 104.909(4) deg. |
| Volume                            | 1257.2(8) Å <sup>3</sup>                                                                           | 1054.8(6) Å <sup>3</sup>                                                                                            | 1183.85(11) Å <sup>3</sup>                                                                                          |
| Z, Calculated density             | 4, 2.403 Mg/m <sup>3</sup>                                                                         | 2, 1.924 Mg/m <sup>3</sup>                                                                                          | 2, 1.754 Mg/m <sup>3</sup>                                                                                          |
| Absorption coefficient            | 12.410 mm <sup>-1</sup>                                                                            | 7.496 mm <sup>-1</sup>                                                                                              | 6.672 mm <sup>-1</sup>                                                                                              |
| F(000)                            | 856                                                                                                | 588                                                                                                                 | 604                                                                                                                 |
| Crystal size                      | 0.10 x 0.09 x 0.05 mm                                                                              | 0.12 x 0.07 x 0.04 mm                                                                                               | 0.26 x 0.21 x 0.10 mm                                                                                               |
| Theta range for data collection   | 3.04 to 28.48 deg                                                                                  | 2.73 to 28.48 deg.                                                                                                  | 1.80 to 25.00 deg.                                                                                                  |
| Limiting indices                  | -14<=h<=14, -11<=k<=10, -17<=l<=18                                                                 | -11<=h<=11, -13<=k<=14, -15<=l<=15                                                                                  | -11<=h<=11, -13<=k<=13, -14<=l<=14                                                                                  |
| Reflections collected / unique    | 9967 / 2915 [R(int) = 0.0678]                                                                      | 8623 / 4657 [R(int) = 0.0392]                                                                                       | 9054 / 4117 [R(int) = 0.0424]                                                                                       |
| Completeness to theta = 26.00     | 99.2 %                                                                                             | 96.3 %                                                                                                              | 98.8 %                                                                                                              |
| Max. and min. transmission        | 0.5380 and 0.3700                                                                                  | 0.7539 and 0.4670                                                                                                   | 0.5225 and 0.2046                                                                                                   |
| Refinement method                 | Full-matrix least-squares on F <sup>2</sup>                                                        | Full-matrix least-squares on F <sup>2</sup>                                                                         | Full-matrix least-squares on F <sup>2</sup>                                                                         |
| Data / restraints / parameters    | 2915 / 3 / 151                                                                                     | 4657 / 0 / 271                                                                                                      | 4117 / 0 / 280                                                                                                      |
| Goodness-of-fit on F <sup>2</sup> | 0.932                                                                                              | 0.919                                                                                                               | 1.019                                                                                                               |
| Final R indices [I>2σ(I)]         | R <sub>1</sub> = 0.0429, wR <sub>2</sub> = 0.0922                                                  | R <sub>1</sub> = 0.0377, wR <sub>2</sub> = 0.0647                                                                   | R <sub>1</sub> = 0.0222, wR <sub>2</sub> = 0.0518                                                                   |
| R indices (all data)              | R <sub>1</sub> = 0.0734, wR <sub>2</sub> = 0.1123                                                  | R <sub>1</sub> = 0.0480, wR <sub>2</sub> = 0.0660                                                                   | R <sub>1</sub> = 0.0268, wR <sub>2</sub> = 0.0552                                                                   |
| Largest diff. peak and hole       | 2.42 and -2.37 e. Å <sup>-3</sup>                                                                  | 1.73 and -1.73 e. Å <sup>-3</sup>                                                                                   | 1.02 and -0.58 e. Å <sup>-3</sup>                                                                                   |

|                                   | <b>4d</b>                                                                                                       | <b>7b</b>                                                                                                            | <b>8b</b>                                                                                                            |
|-----------------------------------|-----------------------------------------------------------------------------------------------------------------|----------------------------------------------------------------------------------------------------------------------|----------------------------------------------------------------------------------------------------------------------|
| Identification code               | CCDC 934323                                                                                                     | CCDC 2097812                                                                                                         | CCDC 2097815                                                                                                         |
| Empirical formula                 | C <sub>27</sub> H <sub>20</sub> Cl <sub>6</sub> Hg N <sub>2</sub> P S Br                                        | C <sub>48</sub> H <sub>48</sub> Hg <sub>2</sub> N <sub>6</sub> O <sub>2</sub> P <sub>2</sub> S <sub>2</sub>          | C <sub>43</sub> H <sub>38</sub> Hg <sub>2</sub> N <sub>4</sub> P <sub>2</sub> S <sub>2</sub>                         |
| Formula weight                    | 928.68                                                                                                          | 1268.16                                                                                                              | 1138.01                                                                                                              |
| Temperature                       | 150(2) K                                                                                                        | 213(2) K                                                                                                             | 213(2) K                                                                                                             |
| Wavelength                        | 0.71073 Å                                                                                                       | 0.71073 Å                                                                                                            | 0.71073 Å                                                                                                            |
| Crystal system, space group       | triclinic, P-1                                                                                                  | triclinic, P-1                                                                                                       | triclinic, P-1                                                                                                       |
| Unit cell dimensions              | a = 9.444(3) Å, α = 86.793(4) deg<br>b = 12.224(3) Å, β = 79.034(4) deg.<br>c = 13.807(4) Å, γ = 87.326(5) deg. | a = 10.1886(6) Å, α = 76.019(4) deg.<br>b = 10.8397(6) Å, β = 71.357(4) deg.<br>c = 12.3566(6) Å, γ = 72.842(4) deg. | a = 12.5564(7) Å, α = 71.447(4) deg.<br>b = 13.6816(7) Å, β = 83.165(5) deg.<br>c = 13.8244(8) Å, γ = 64.836(4) deg. |
| Volume                            | 1561.4(7) Å <sup>3</sup>                                                                                        | 1219.06(11) Å <sup>3</sup>                                                                                           | 2037.45(19) Å <sup>3</sup>                                                                                           |
| Z, Calculated density             | 2, 1.975 Mg/m <sup>3</sup>                                                                                      | 1, 1.730Mg/m <sup>3</sup>                                                                                            | 2, 1.855 Mg/m <sup>3</sup>                                                                                           |
| Absorption coefficient            | 6.862 mm <sup>-1</sup>                                                                                          | 6.484 mm <sup>-1</sup>                                                                                               | 7.743 mm <sup>-1</sup>                                                                                               |
| F(000)                            | 888                                                                                                             | 616                                                                                                                  | 1092                                                                                                                 |
| Crystal size                      | 0.23 x 0.18 x 0.16 mm                                                                                           | 0.20 x 0.10 x 0.08 mm                                                                                                | 0.26 x 0.16 x 0.11 mm                                                                                                |
| Theta range for data collection   | 2.42 to 28.45 deg                                                                                               | 1.76 to 26.00 deg                                                                                                    | 1.55 to 26.00 deg.                                                                                                   |
| Limiting indices                  | -12<=h<=12, -15<=k<=16, -17<=l<=17                                                                              | -12<=h<=12, -13<=k<=13, -15<=l<=15                                                                                   | -15<=h<=15, -16<=k<=16, -17<=l<=17                                                                                   |
| Reflections collected / unique    | 12571 / 6784 [R(int) = 0.0489]                                                                                  | 9597 / 4766 [R(int) = 0.0344]                                                                                        | 15331 / 7898 [R(int) = 0.0700]                                                                                       |
| Completeness to theta = 26.00     | 96.6 %                                                                                                          | 99.2 %                                                                                                               | 98.5 %                                                                                                               |
| Max. and min. transmission        | 0.4065 and 0.1607                                                                                               | 0.6250 and 0.3571                                                                                                    | 0.4830 and 0.2380                                                                                                    |
| Refinement method                 | Full-matrix least-squares on F <sup>2</sup>                                                                     | Full-matrix least-squares on F <sup>2</sup>                                                                          | Full-matrix least-squares on F <sup>2</sup>                                                                          |
| Data / restraints / parameters    | 6784 / 0 / 352                                                                                                  | 4766 / 76 / 300                                                                                                      | 7898 / 0 / 478                                                                                                       |
| Goodness-of-fit on F <sup>2</sup> | 0.942                                                                                                           | 1.003                                                                                                                | 1.011                                                                                                                |
| Final R indices [I>2sigma(I)]     | R <sub>1</sub> = 0.0449, wR <sub>2</sub> = 0.0945                                                               | R <sub>1</sub> = 0.0241, wR <sub>2</sub> = 0.0558                                                                    | R <sub>1</sub> = 0.0410, wR <sub>2</sub> = 0.0981                                                                    |
| R indices (all data)              | R <sub>1</sub> = 0.0581, wR <sub>2</sub> = 0.0966                                                               | R <sub>1</sub> = 0.0298, wR <sub>2</sub> = 0.0578                                                                    | R <sub>1</sub> = 0.0613, wR <sub>2</sub> = 0.1099                                                                    |
| Largest diff. peak and hole       | 2.47 and -2.65 e. Å <sup>-3</sup>                                                                               | 1.32 and -0.62 e. Å <sup>-3</sup>                                                                                    | 2.03 and -1.99 e. Å <sup>-3</sup>                                                                                    |

|                                    | <b>8c</b>                                                                                                                               | <b>9b [ref 7]</b>                                                                                                                        |
|------------------------------------|-----------------------------------------------------------------------------------------------------------------------------------------|------------------------------------------------------------------------------------------------------------------------------------------|
| Identification code                | CCDC 2097814                                                                                                                            | CCDC 934322                                                                                                                              |
| Empirical formula                  | C <sub>41</sub> H <sub>32</sub> Cl <sub>2</sub> Hg <sub>2</sub> N <sub>4</sub> P <sub>2</sub> S <sub>2</sub>                            | C <sub>36</sub> H <sub>34</sub> Hg N <sub>2</sub> P <sub>2</sub> S                                                                       |
| Formula weight                     | 1178.85                                                                                                                                 | 789.24                                                                                                                                   |
| Temperature                        | 213(2) K                                                                                                                                | 200(2) K                                                                                                                                 |
| Wavelength                         | 0.71073 Å                                                                                                                               | 0.71073 Å                                                                                                                                |
| Crystal system, space group        | triclinic, P-1                                                                                                                          | triclinic, P-1                                                                                                                           |
| Unit cell dimensions               | a = 12.4945(7) Å, $\alpha$ = 72.695(4) deg<br>b = 13.6153(7) Å, $\beta$ = 83.393(4) deg.<br>c = 13.7342(7) Å, $\gamma$ = 65.524(4) deg. | a = 10.7428(7) Å, $\alpha$ = 72.356(5) deg.<br>b = 11.9618(7) Å, $\beta$ = 72.063(5) deg.<br>c = 14.0140(9) Å, $\gamma$ = 88.360(5) deg. |
| Volume                             | 2030.11(19) Å <sup>3</sup>                                                                                                              | 1628.55(18) Å <sup>3</sup>                                                                                                               |
| Z, Calculated density              | 2, 1.928 Mg/m <sup>3</sup>                                                                                                              | 2, 1.609 Mg/m <sup>3</sup>                                                                                                               |
| Absorption coefficient             | 7.902 mm <sup>-1</sup>                                                                                                                  | 4.916 mm <sup>-1</sup>                                                                                                                   |
| F(000)                             | 1124                                                                                                                                    | 780                                                                                                                                      |
| Crystal size                       | 0.23 x 0.12 x 0.04 mm                                                                                                                   | 0.12 x 0.11 x 0.09 mm                                                                                                                    |
| Theta range for data collection    | 1.55 to 25.00 deg                                                                                                                       | 3.98 to 29.19 deg.                                                                                                                       |
| Limiting indices                   | -14<math>\leq h \leq 14, -12 \leq k \leq 16, -16 \leq l \leq 16                                                                         | -14<math>\leq h \leq 14, -16 \leq k \leq 16, -19 \leq l \leq 19                                                                          |
| Reflections collected / unique     | 13879 / 7060 [R(int) = 0.0632]                                                                                                          | 22909 / 8763 [R(int) = 0.0789]                                                                                                           |
| Completeness to theta = 26.00      | 98.7 %                                                                                                                                  | 99.3 %                                                                                                                                   |
| Max. and min. transmission         | 0.7428 and 0.2637                                                                                                                       | 0.6660 and 0.5900                                                                                                                        |
| Refinement method                  | Full-matrix least-squares on F <sup>2</sup>                                                                                             | Full-matrix least-squares on F <sup>2</sup>                                                                                              |
| Data / restraints / parameters     | 7060 / 0 / 478                                                                                                                          | 8763 / 0 / 379                                                                                                                           |
| Goodness-of-fit on F <sup>2</sup>  | 0.994                                                                                                                                   | 0.695                                                                                                                                    |
| Final R indices [I>2 $\sigma$ (I)] | R <sub>1</sub> = 0.0452, wR <sub>2</sub> = 0.1083                                                                                       | R <sub>1</sub> = 0.0330, wR <sub>2</sub> = 0.0517                                                                                        |
| R indices (all data)               | R <sub>1</sub> = 0.0649, wR <sub>2</sub> = 0.1204                                                                                       | R <sub>1</sub> = 0.0852, wR <sub>2</sub> = 0.0602                                                                                        |
| Largest diff. peak and hole        | 2.52 and -1.68 e. Å <sup>-3</sup>                                                                                                       | 1.78 and -2.64 e. Å <sup>-3</sup>                                                                                                        |
